# Supplementary material
Source: publisher site journal article supplement (http://www.kjim.org/upload/media/kjim-2022-339-Supplementary-Table-1.pdf)
Supplement: Supplementary file 1 [file kjim-2022-339-Supplementary-Table-1.pdf]

**Supplementary Table 1. Comparison of baseline characteristics of patients with and without poor renal outcomes**

| Parameter                                | Without poor renal outcome (n = 50) | With poor renal outcome (n = 21) | p value |
|------------------------------------------|-------------------------------------|----------------------------------|---------|
| <b>Clinical features</b>                 |                                     |                                  |         |
| Age, yr                                  | 35 ± 14                             | 38 ± 15                          | 0.325   |
| Female                                   | 42 (84.0)                           | 18 (85.7)                        | 0.858   |
| Hypertension                             | 23 (46.0)                           | 11 (52.4)                        | 0.328   |
| Diabetes mellitus                        | 5 (10.0)                            | 2 (9.5)                          | 0.219   |
| Dyslipidemia                             | 8 (16.0)                            | 2 (9.5)                          | 0.128   |
| SLEDAI                                   | 19 ± 6                              | 21 ± 7                           | 0.432   |
| Extrarenal SLEDAI                        | 9 ± 5                               | 11 ± 6                           | 0.374   |
| Duration from diagnosis of SLE to LN, yr | 2.3 ± 0.9                           | 1.8 ± 1.0                        | 0.277   |
| Anti-phospholipid syndrome               | 6 (12.0)                            | 1 (4.8)                          | 0.068   |
| <b>Laboratory data</b>                   |                                     |                                  |         |
| ESR, mm/h                                | 36.99 ± 24.91                       | 0.98 ± 0.09                      | 0.538   |
| CRP, mg/dL                               | 1.59 ± 1.27                         | 3.80 ± 2.09                      | 0.148   |
| Creatinine, mg/dL                        | 0.97 ± 0.21                         | 1.28 ± 0.67                      | 0.096   |
| Anti-dsDNA, IU/mL                        | 42.52 ± 79.02                       | 96.61 ± 30.94                    | 0.426   |
| C3, mg/dL                                | 68.35 ± 27.12                       | 77.75 ± 28.20                    | 0.191   |
| C4, mg/dL                                | 13.99 ± 9.46                        | 15.70 ± 7.87                     | 0.469   |
| Albumin, mg/dL                           | 2.6 ± 0.8                           | 2.85 ± 0.7                       | 0.397   |
| <b>Renal profiles</b>                    |                                     |                                  |         |
| eGFR at LN diagnosis                     | 115.98 ± 35.03                      | 94.72 ± 41.00                    | 0.030   |
| Urine protein/creatinine, mg/g           | 3,961 ± 3,907                       | 3,285 ± 3,019                    | 0.481   |
| > 1,000                                  | 44 (88.0)                           | 15 (71.4)                        | 0.147   |
| > 3,000                                  | 26 (52.0)                           | 9 (42.9)                         | 0.489   |
| eGFR at 6 M                              | 109.85 ± 36.07                      | 88.05 ± 39.05                    | 0.001   |
| eGFR at 12 M                             | 106.22 ± 38.61                      | 84.22 ± 34.61                    | 0.000   |
| Complete remission at 6 M,               | 44 (88.0)                           | 14 (66.7)                        | 0.075   |
| Complete remission at 12 M               | 43 (86.0)                           | 16 (76.2)                        | 0.321   |
| <b>Biopsy profiles</b>                   |                                     |                                  |         |
| Class I                                  | 3 (6.0)                             | 1 (4.8)                          | 0.839   |
| Class II                                 | 11 (22.0)                           | 6 (28.6)                         | 0.560   |
| Class V                                  | 34 (68.0)                           | 14 (66.7)                        | 0.914   |
| Class II + V                             | 2 (4.0)                             | 0 (0.0)                          | 0.360   |
| Chronicity score                         | 3 ± 1                               | 5 ± 2                            | 0.099   |
| Activity score                           | 4 ± 2                               | 6 ± 3                            | 0.035   |
| <b>Medications<sup>a)</sup></b>          |                                     |                                  |         |
| ACEi/ARB                                 | 31 (62.0)                           | 15 (71.4)                        | 0.455   |
| Hydroxychloroquine                       | 39 (78.0)                           | 14 (66.7)                        | 0.323   |
| Corticosteroid                           | 43 (86.0)                           | 19 (90.5)                        | 0.611   |
| CNI                                      | 22 (44.0)                           | 7 (33.3)                         | 0.411   |
| MMF                                      | 3 (6.0)                             | 2 (9.5)                          | 0.603   |
| AZA                                      | 13 (26.0)                           | 7 (33.3)                         | 0.537   |

**Supplementary Table 1. Continued**

| Parameter                 | Without poor renal outcome (n = 50) | With poor renal outcome (n = 21) | <i>p</i> value |
|---------------------------|-------------------------------------|----------------------------------|----------------|
| Medications <sup>b)</sup> |                                     |                                  |                |
| ACEi/ARB                  | 35 (70.0)                           | 17 (81.0)                        | 0.397          |
| Hydroxychloroquine        | 46 (92.0)                           | 18 (85.7)                        | 0.438          |
| Corticosteroid            | 44 (88.0)                           | 19 (90.5)                        | 0.895          |
| CNI                       | 22 (44.0)                           | 9 (42.9)                         | 0.998          |
| MMF                       | 3 (6.0)                             | 2 (9.5)                          | 0.603          |
| AZA                       | 13 (26.0)                           | 9 (42.9)                         | 0.227          |

Values are presented as mean±standard deviation or number (%).

SLEDAI, Systemic Lupus Erythematosus Disease Activity Index; LN, lupus nephritis; ESR, erythrocyte sedimentation rate; CRP, c-reactive protein; anti-dsDNA, anti-double stranded DNA; C3/C4; complement 3/4; eGFR, estimated glomerular filtration rate; ACEi, angiotensin-converting enzyme inhibitor; ARB, angiotensin receptor blocker; CNI, calcineurin inhibitor; MMF, mycophenolate mofetil; AZA, azathioprine.

<sup>a)</sup>Medications maintained for at least 1 year since lupus nephritis diagnosis.

<sup>b)</sup>Medications maintained for at least 1 year since SLE diagnosis.

*p* values were calculated by unpaired t-test for continuous variables and Fisher's exact tests for categorical variables.
